# Supplementary material for: Filling the gap between topological insulator nanomaterials and triboelectric nanogenerators
Source: PubMed Central journal article supplement (PMC8854595; doi:10.1038/s41467-022-28575-3), 2022-02-17
Supplement: 41467_2022_28575_MOESM3_ESM.pdf [file 41467_2022_28575_MOESM3_ESM.pdf]

## **Description of Additional Supplementary Files**

**File Name:** Supplementary Movie 1

**Description:** TI-TENG-based power source. Demonstration of lighting up hundreds of LEDs by a TITENG power source

**File Name:** Supplementary Movie 2

**Description:** Storage of electricity and charging of a commercial thermohygrometer. Demonstration of electricity storage process on a bridge circuit and driving of portable electronics like thermohygrometer by self-powered TI-TENG.

**File Name:** Supplementary Movie 3

**Description:** Storage of electricity and charging of a portable currency detector. Demonstration of electricity storage process on a bridge circuit driving of portable electronics like UV-light detector by self-powered TI-TENG.

**File Name:** Supplementary Movie 4

**Description:** Self-powered game controller. Demonstration of an integrated TI-TENG sensory arraybased game controller.

**File Name:** Supplementary Movie 5

**Description:** Self-powered wireless smart glasses. Demonstration of real-time signal sensing ability to serve as a self-powered music controller via a TI-TENG sensory array.
